# Supplementary material for: National Study of Health Insurance Type and Reasons for Emergency Department Use
Source: Springer Nature journal article supplement (doi:10.1007/s11606-013-2734-4), 2013-12-23
Supplement: MOESM2 [file 11606_2013_2734_MOESM2_ESM.docx]

**Appendix Table 2: Characteristics by individual reasons for last emergency department visit relating to access to outpatient care**

| **Characteristics** | **Didn’t have another place to go** | **Doctor’s office/ clinic not open** | **ED is closest provider** | **ED is usual place to get care** |
| --- | --- | --- | --- | --- |
|  | **% (95%CI)** | **% (95%CI)** | **% (95%CI)** | **% (95%CI)** |
| **TOTAL** | 46.3 (44.2-48.4) | 49.3 (47.4-51.1) | 45.9 (43.7-48.0) | 16.1 (14.7-17.6) |
|  |  |  |  |  |
| **Demographic Characteristics** |  |  |  |  |
| Age, years |  |  |  |  |
| 18-34 | 48.9 (45.3-52.5) | 48.4 (45.0-51.8) | 45.9 (42.6-49.2) | 20.8 (18.4-23.4) |
| 35-49 | 48.6 (45.1-52.2) | 50.2 (47.0-53.4) | 48.1 (44.5-51.6) | 16.8 (14.3-19.7) |
| 50-64 | 44.5 (40.7-48.4) | 49.9 (46.0-53.8) | 45.5 (41.1-49.9) | 12.9 (10.7-15.5) |
| ≥65 | 37.9 (33.7-42.3) | 48.7 (44.6-52.9) | 42.4 (38.0-47.0) | 6.7 (4.9-9.1) |
| Female sex | 45.5 (43.1-47.9) | 52.3 (49.8-54.8) | 43.5 (43.7-48.0) | 13.5 (12.0-15.2) |
| Race/ethnicity |  |  |  |  |
| Non-hispanic white | 45.7 (43.0-48.5) | 51.0 (49.0-51.3) | 43.5 (40.9-46.2) | 12.7 (11.1-14.5) |
| Non-hispanic black | 45.3 (41.6-49.1) | 45.9 (41.3-50.6) | 52.9 (48.6-57.1) | 23.9 (20.8-27.2) |
| Hispanic | 50.3 (45.4-55.1) | 42.8 (38.4-47.3) | 49.0 (44.0-54.0) | 23.7 (19.8-28.1) |
| Non-hispanic asian | 41.1 (33.0-49.7) | 51.6 (41.2-61.9) | 47.9 (36.8-59.2) | 10.8 (6.5-17.3) |
| Other | 58.5 (43.4-72.2) | 54.8 (38.8-69.8) | 47.3 (32.8-62.3) | 28.4 (16.4-44.6) |
| Census region |  |  |  |  |
| Northeast | 38.3 (33.7-43.1) | 40.1 (36.1-44.2) | 44.0 (38.3-49.7) | 13.4 (10.4-17.0) |
| Midwest | 46.4 (41.4-51.4) | 54.3 (50.2-58.4) | 45.7 (41.5-50.0) | 15.1 (12.5-18.1) |
| South | 48.7 (45.4-52.0) | 48.4 (45.2-51.6) | 46.1 (42.7-49.6) | 18.9 (16.4-21.6) |
| West | 49.2 (45.2-53.2) | 53.2 (49.5-56.8) | 47.3 (43.1-51.6) | 14.4 (11.7-17.6) |
| Education |  |  |  |  |
| <High school graduate | 51.9 (47.6-56.3) | 47.3 (43.2-51.5) | 48.8 (44.4-53.2) | 24.7 (21.0-28.8) |
| High school graduate | 46.8 (42.8-50.9) | 48.2 (44.7-51.7) | 45.2 (41.2-49.2) | 16.7 (14.1-19.7) |
| ≥Some college | 44.1 (41.4-46.7) | 50.4 (47.8-53.1) | 45.1 (42.5-47.8) | 12.8 (11.2-14.6) |
| **Access to Healthcare** |  |  |  |  |
| Health insurance type |  |  |  |  |
| Any Private | 40.7 (38.1-43.4) | 51.9 (48.9-54.9) | 44.0 (40.8-47.2) | 8.3 (6.8-10.0) |
| Medicare+Private | 36.2 (30.5-42.4) | 47.9 (41.5-53.5) | 40.4 (34.5-46.7) | 5.1 (2.9-8.6) |
| Medicare+Medicaid | 45.8 (36.2-55.7) | 54.5 (45.3-63.5) | 45.8 (36.4-55.4) | 12.0 (7.7-18.1) |
| Medicare only (+/- other) | 40.1 (34.4-46.0) | 54.3 (48.9-59.7) | 45.1 (38.9-51.4) | 10.3 (7.4-14.2) |
| Medicaid only (+/- other) | 51.5 (45.4-57.6) | 62.0 (57.0-66.9) | 45.9 (40.8-51.1) | 17.0 (13.3-21.4) |
| Other | 43.7 (36.3-51.2) | 49.6 (42.3-56.9) | 43.5 (36.7-50.6) | 10.7 (7.3-15.6) |
| Uninsured | 63.1 (58.7-67.2) | 33.4 (29.5-37.5) | 53.0 (48.6-57.3) | 41.8 (37.7-45.9) |
| No defined source of primary care | 62.9 (58.5-67.2) | 28.6 (24.8-32.6) | 55.2 (51.0-59.3) | 50.2 (45.9-54.5) |
| **Health Conditions** |  |  |  |  |
| Health status |  |  |  |  |
| Excellent | 40.6 (36.8-44.5) | 45.1 (41.2-49.0) | 44.2 (40.0-48.5) | 16.3 (13.6-19.4) |
| Very good | 46.5 (42.9-50.2) | 47.9 (44.6-51.2) | 46.1 (42.6-49.6) | 13.6 (11.3-16.3) |
| Good | 48.7 (45.3-52.1) | 51.3 (48.0-54.7) | 47.6 (44.2-51.1) | 15.9 (13.5-18.7) |
| Fair-poor | 48.5 (44.0-53.0 | 52.3 (48.5-56.1) | 44.7 (40.5-49.0) | 19.0 (16.2-22.2) |

ED, emergency department
